# Supplementary material for: Systematic comparison of hUC-MSCs at various passages reveals the variations of signatures and therapeutic effect on acute graft-versus-host disease
Source: PubMed Central journal article supplement (PMC6883552; doi:10.1186/s13287-019-1478-4), 2019-11-28

**a**

| Pathway  | Pathway_name                           | Pathway_id                   | Database | fg_items | bg_items | rich_factor | pvalue   | qvalue   | Genes        |
|----------|----------------------------------------|------------------------------|----------|----------|----------|-------------|----------|----------|--------------|
| hsa05205 | Proteoglycans in cancer                | PROTEOGLYCANS IN CANCER      | KEGG     | 1        | 205      | 0           | 3.97E-01 | 4.23E-01 | TP53         |
| hsa04151 | PI3K-Akt signaling pathway             | PI3K-AKT SIGNALING PATHWAY   | KEGG     | 2        | 341      | 0.01        | 1.99E-01 | 2.88E-01 | PPP2R5E TP53 |
| hsa04210 | Apoptosis                              | APOPTOSIS                    | KEGG     | 1        | 140      | 0.01        | 2.91E-01 | 3.41E-01 | TP53         |
| hsa04110 | Cell cycle                             | CELL CYCLE                   | KEGG     | 1        | 124      | 0.01        | 2.62E-01 | 3.34E-01 | TP53         |
| hsa05223 | Non-small cell lung cancer             | NON-SMALL CELL LUNG CANCER   | KEGG     | 1        | 56       | 0.02        | 1.28E-01 | 2.79E-01 | TP53         |
| hsa04530 | Tight junction                         | TIGHT JUNCTION               | KEGG     | 2        | 139      | 0.01        | 4.37E-02 | 2.79E-01 | MPDZ MAPK1   |
| hsa03015 | mRNA surveillance pathway              | MRNA SURVEILLANCE PATHWAY    | KEGG     | 1        | 91       | 0.01        | 1.99E-01 | 2.88E-01 | PPP2R5E TP53 |
| hsa04933 | AGE-RAGE signaling pathway in diabetic | AGE-RAGE SIGNALING PATHWAY   | KEGG     | 1        | 101      | 0.01        | 2.19E-01 | 3.03E-01 | DIAPH1       |
| hsa03460 | Fanconi anemia pathway                 | FANCONI ANEMIA PATHWAY       | KEGG     | 1        | 53       | 0.02        | 1.21E-01 | 2.79E-01 | REV1         |
| hsa05160 | Hepatitis C                            | HEPATITIS C                  | KEGG     | 1        | 133      | 0.01        | 2.78E-01 | 3.41E-01 | TP53         |
| hsa04211 | Longevity regulating pathway           | LONGEVITY REGULATING PATHWAY | KEGG     | 1        | 94       | 0.01        | 2.05E-01 | 2.90E-01 | TP53         |
| hsa05161 | Hepatitis B                            | HEPATITIS B                  | KEGG     | 1        | 146      | 0.01        | 3.01E-01 | 3.41E-01 | TP53         |
| hsa05010 | Alzheimer's disease                    | ALZHEIMER'S DISEASE          | KEGG     | 1        | 168      | 0.01        | 3.38E-01 | 3.73E-01 | LRP1         |
| hsa05169 | Epstein-Barr virus infection           | EPSTEIN-BARR VIRUS INFECTION | KEGG     | 3        | 202      | 0.01        | 1.19E-02 | 2.68E-01 | TBP TP53     |
| hsa05215 | Prostate cancer                        | PROSTATE CANCER              | KEGG     | 1        | 89       | 0.01        | 1.95E-01 | 2.88E-01 | TP53         |
| hsa04918 | Thyroid hormone synthesis              | THYROID HORMONE SYNTHESIS    | KEGG     | 1        | 71       | 0.01        | 1.59E-01 | 2.79E-01 | TG           |
| hsa05218 | Melanoma                               | MELANOMA                     | KEGG     | 1        | 71       | 0.01        | 1.59E-01 | 2.79E-01 | TP53         |
| hsa05222 | Small cell lung cancer                 | SMALL CELL LUNG CANCER       | KEGG     | 1        | 86       | 0.01        | 1.89E-01 | 2.88E-01 | TP53         |

**b**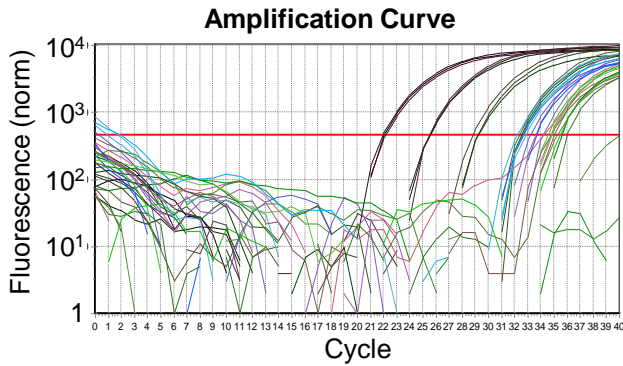**c**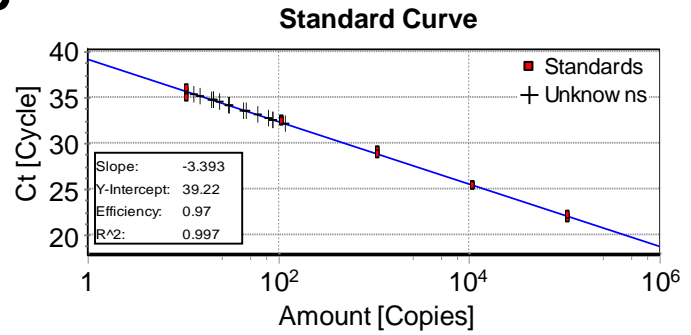**d**

### Content of hUC-MSCs in tissues

| Time (day) | Mice (NO.) | Organ  | $\beta$ -globin (copies) | Total DNA Con ( $\mu$ g) | Relative MSC Con (ng/ $\mu$ g) |
|------------|------------|--------|--------------------------|--------------------------|--------------------------------|
| 1          | 3206       | Lung   | 18.8                     | 0.065                    | 4.32                           |
| 1          | 3206       | Kidney | 11.9                     | 0.500                    | 0.35                           |
| 1          | 3207       | Lung   | 94.0                     | 0.415                    | 3.38                           |
| 1          | 3208       | Lung   | 21.8                     | 0.500                    | 0.65                           |
| 1          | 3209       | Lung   | 32.2                     | 0.500                    | 0.96                           |
| 1          | 3209       | Femur  | 25.6                     | 0.500                    | 0.76                           |
| 1          | 3210       | Lung   | 62.9                     | 0.500                    | 1.88                           |
| 21         | 3212       | Heart  | 12.3                     | 0.500                    | 0.37                           |
| 21         | 3215       | Heart  | 68.1                     | 0.500                    | 2.03                           |
| 21         | 3215       | Femur  | 40.2                     | 0.500                    | 1.20                           |

**e**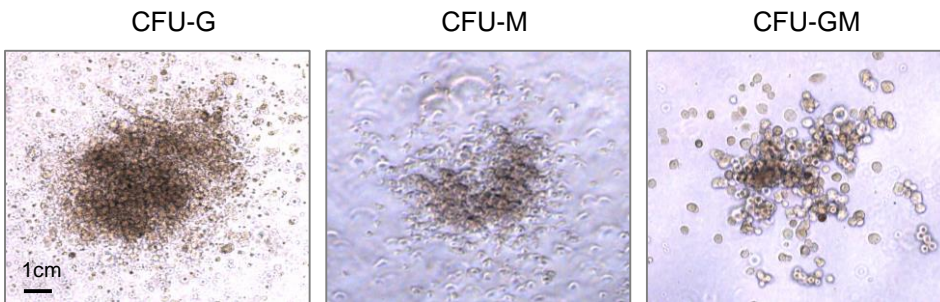

Supplement: 13287_2019_1478_MOESM3_ESM.pdf [file 13287_2019_1478_MOESM3_ESM.pdf]
