# Supplementary material for: Systematic comparison of hUC-MSCs at various passages reveals the variations of signatures and therapeutic effect on acute graft-versus-host disease
Source: PubMed Central journal article supplement (PMC6883552; doi:10.1186/s13287-019-1478-4), 2019-11-28

**a**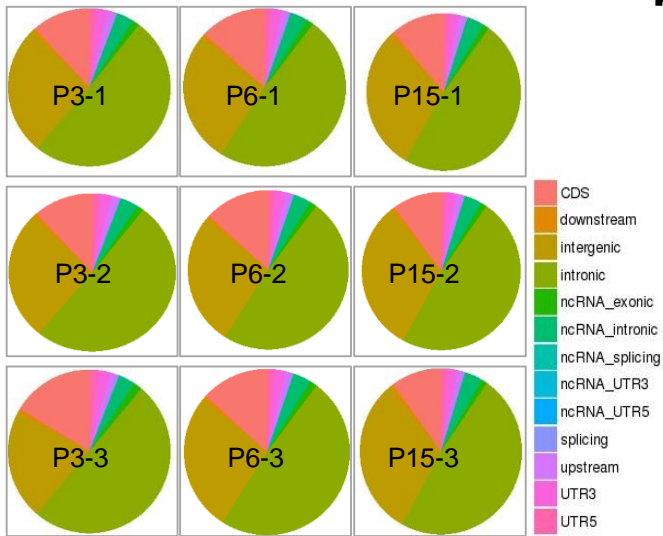**b**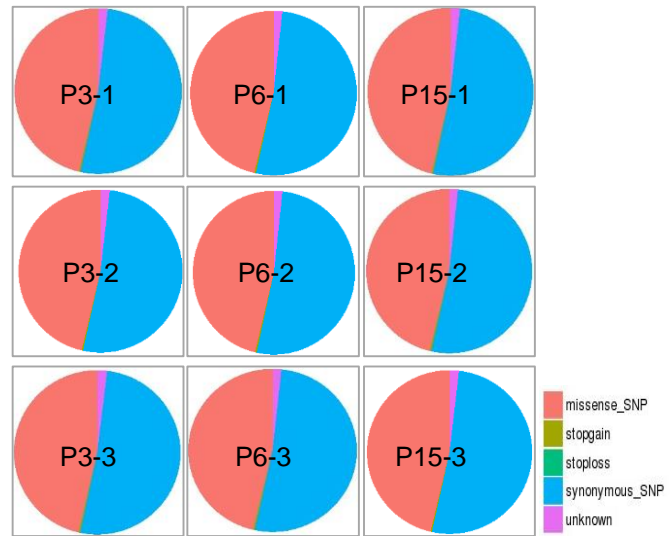**c**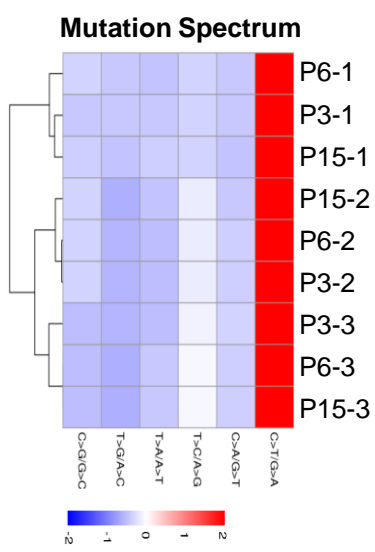**d**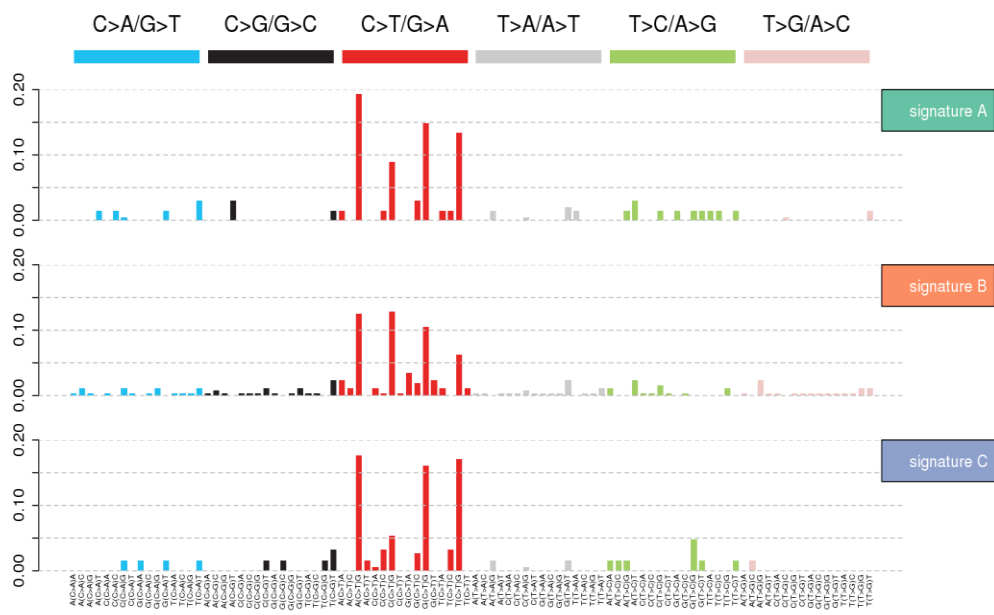**e**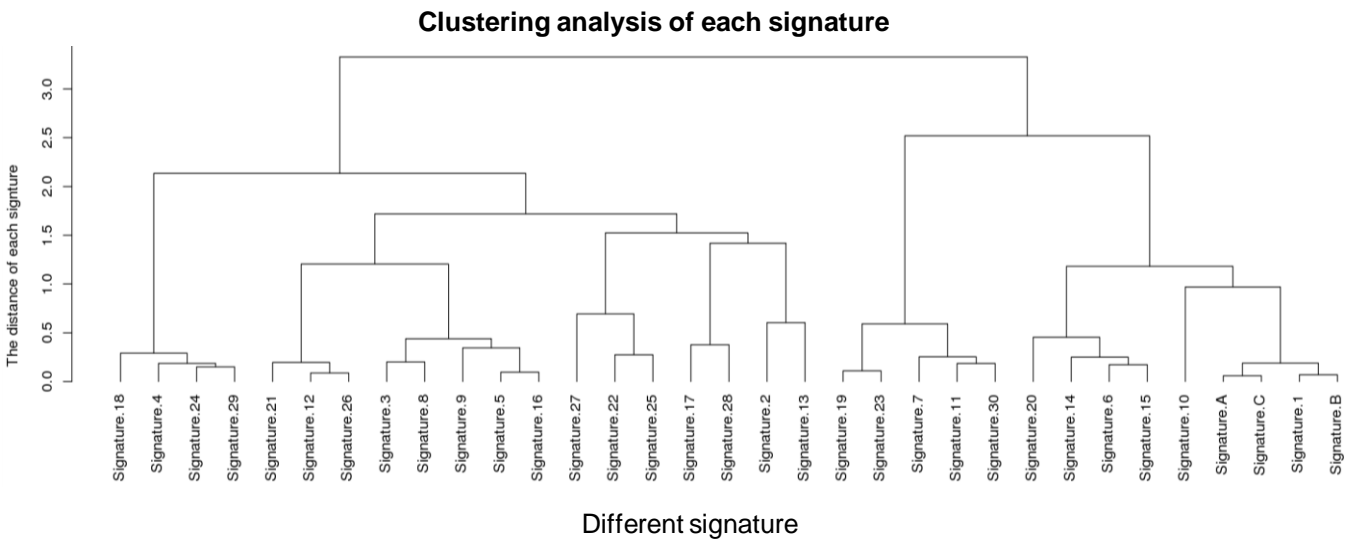

Supplement: 13287_2019_1478_MOESM2_ESM.pdf [file 13287_2019_1478_MOESM2_ESM.pdf]
