# Supplementary material for: Systematic comparison of hUC-MSCs at various passages reveals the variations of signatures and therapeutic effect on acute graft-versus-host disease
Source: PubMed Central journal article supplement (PMC6883552; doi:10.1186/s13287-019-1478-4), 2019-11-28
Supplement: 13287_2019_1478_MOESM4_ESM.pdf [file 13287_2019_1478_MOESM4_ESM.pdf]

**a****Clinical symptoms and physical index score of aGVHD mice**

| <b>Clinical index score</b> | <b>0</b>  | <b>1</b>                         | <b>2</b>                    |
|-----------------------------|-----------|----------------------------------|-----------------------------|
| Weigh loss                  | <10%      | 10%-25%                          | >25%                        |
| Position                    | Normal    | Dorsiflexion at rest             | Severe dorsiflexion         |
| Activity                    | Normal    | Slight or moderate reduction     | Resting and motionless      |
| Hair texture                | Smooth    | Slight or moderate bristles      | Severely bristly and untidy |
| Skin integrity              | Integrity | Claws or scales of tail fall off | Skin is visibly exposed     |
